## Supplemental Data

This Online-Only Data Supplement has been provided by the authors to provide readers with additional information.

**Supplement to:**

**Prediction models for the 5- and 10-year incidence of home morning hypertension: The Ohasama Study**

**Table S1. Characteristics in the not followed-up participants without home hypertension**

| Variables at baseline     | Followed   | Not followed | <i>P</i> |
|---------------------------|------------|--------------|----------|
| N                         | 978        | 221          | -        |
| Men, %                    | 30.1       | 44.8         | <0.0001  |
| Age, years                | 53.3±9.9   | 56.1±12.0    | 0.0011   |
| BMI, kg/m <sup>2</sup>    | 23.2±2.9   | 23.2±2.9     | 0.93     |
| Current smokers, %        | 17.2       | 23.5         | 0.034    |
| Current drinkers, %       | 21.3       | 35.0         | <0.0001  |
| Diabetes, %               | 7.6        | 10.0         | 0.27     |
| Total cholesterol, mmol/L | 5.0±0.9    | 5.0±0.8      | 0.79     |
| Home SBP, mmHg            | 114.9±9.6  | 117.7±10.0   | 0.0001   |
| Home DBP, mmHg            | 70.0±7.4   | 71.4±7.4     | 0.011    |
| Office SBP, mmHg          | 123.8±14.7 | 127.4±15.5   | 0.0020   |
| Office DBP, mmHg          | 71.4±9.8   | 72.8±9.5     | 0.046    |

BMI, body mass index; SBP, systolic blood pressure; DBP, diastolic blood pressure.

**Table S2. The discrimination ability of the full model according to age category**

| Age category    | Harrell's C-statistics (95% confidence interval) |                             |
|-----------------|--------------------------------------------------|-----------------------------|
|                 | The 5-year risk prediction                       | The 10-year risk prediction |
| <45 years old   | 0.7410 (0.6022–0.8603)                           | 0.7033 (0.6027–0.7917)      |
| 45–54 years old | 0.8346 (0.7477–0.9157)                           | 0.7800 (0.6942–0.8635)      |
| 55–64 years old | 0.7499 (0.6756–0.8161)                           | 0.6866 (0.6260–0.7409)      |
| ≥65 years old   | 0.6706 (0.5288–0.8106)                           | 0.6778 (0.5531–0.7964)      |

**Table S3. Summary of Harrell's C-statistics in the validation cohort**

| Model (condition)                                                       | Harrell's C statistics<br>(95% confidence interval) |                           | Calibration plot<br>Slope/intercept |              | Figure number |
|-------------------------------------------------------------------------|-----------------------------------------------------|---------------------------|-------------------------------------|--------------|---------------|
|                                                                         | 5-year risk                                         | 10-year risk              | 5-year risk                         | 10-year risk |               |
| Full model                                                              | 0.7637<br>(0.7195–0.8100)                           | 0.7308<br>(0.6932–0.7677) | 1.10/–0.04                          | 1.02/ 0.06   | Figure 1      |
| Model without home SBP                                                  | 0.6889<br>(0.6299–0.7430)                           | 0.6689<br>(0.6266–0.7067) | 0.79/0.01                           | 1.05/0.03    | Figure 1      |
| Full Model<br>(initial 5-day home SBP used)                             | 0.7249<br>(0.6714–0.7784)                           | 0.6911<br>(0.6514–0.7333) | 0.81/0.03                           | 0.98/0.07    | Figure S3     |
| Full Model<br>(initial 7-day home SBP used)                             | 0.7352<br>(0.6781–0.7868)                           | 0.6966<br>(0.6568–0.7375) | 0.91/0.00                           | 0.99/0.05    | Figure S3     |
| Full Model<br>(hypertension outcome based on<br>the ACC/AHA guidelines) | 0.7307<br>(0.6878–0.7738)                           | 0.7226<br>(0.6893–0.7561) | 0.97/0.03                           | 1.11/0.07    | Figure S4     |
| Only home SBP model                                                     | 0.7665<br>(0.7175–0.8114)                           | 0.7324<br>(0.6954–0.7684) | 1.20/–0.07                          | 1.09/0.02    | Figure S5     |
| Framingham Heart Study model*                                           | 0.6390<br>(0.5938–0.6822)                           | -                         | 0.43/0.11                           | -            | Figure S6     |

SBP, systolic blood pressure

\*Parikh NI et al. (2008) have not provided the 10-year risk probability according to the prediction score of the Framingham Heart Study model.

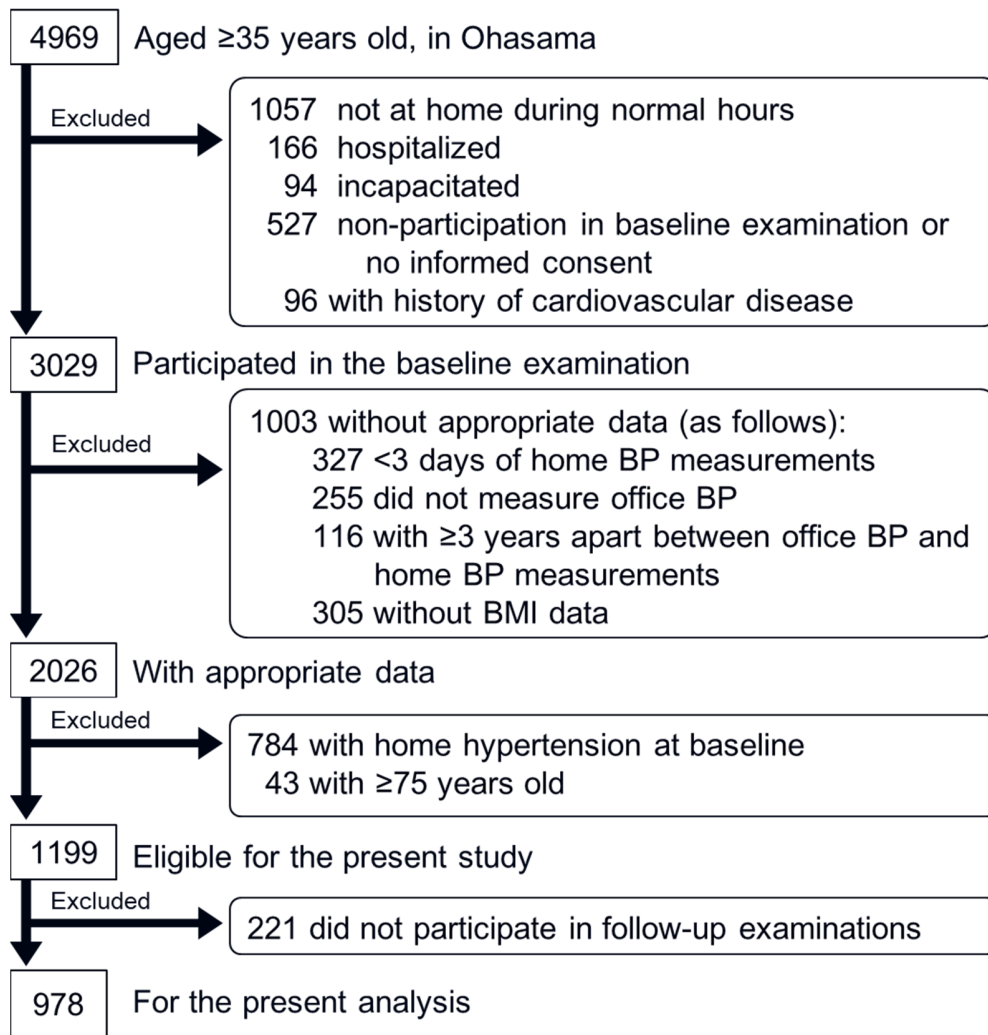

**Figure S1. Flow chart outlining the participant selection procedure**

BMI, body mass index; BP, blood pressure.

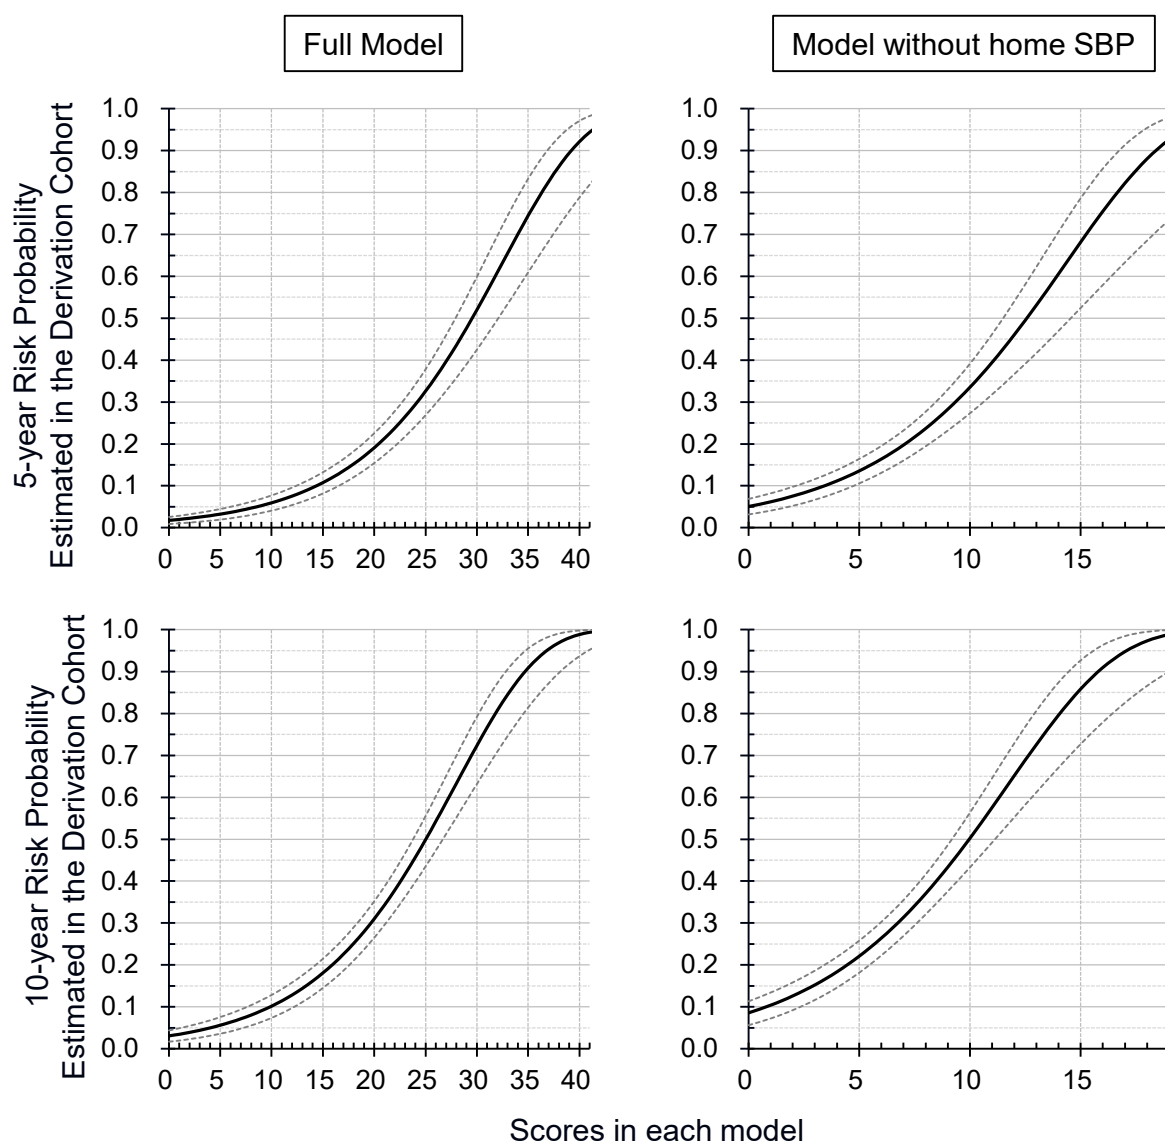

**Figure S2. 5- and 10-year home hypertension risk according to scores.**

The solid and broken gray lines indicate the 5-year or 10-year home hypertension risk and their 95% confidence intervals, respectively. The probability was calculated in the derivation cohort. The full model included sex, body mass index, current smoking status, office SBP, and home SBP. Models without home SBP did not contain home SBP. SBP, systolic blood pressure.

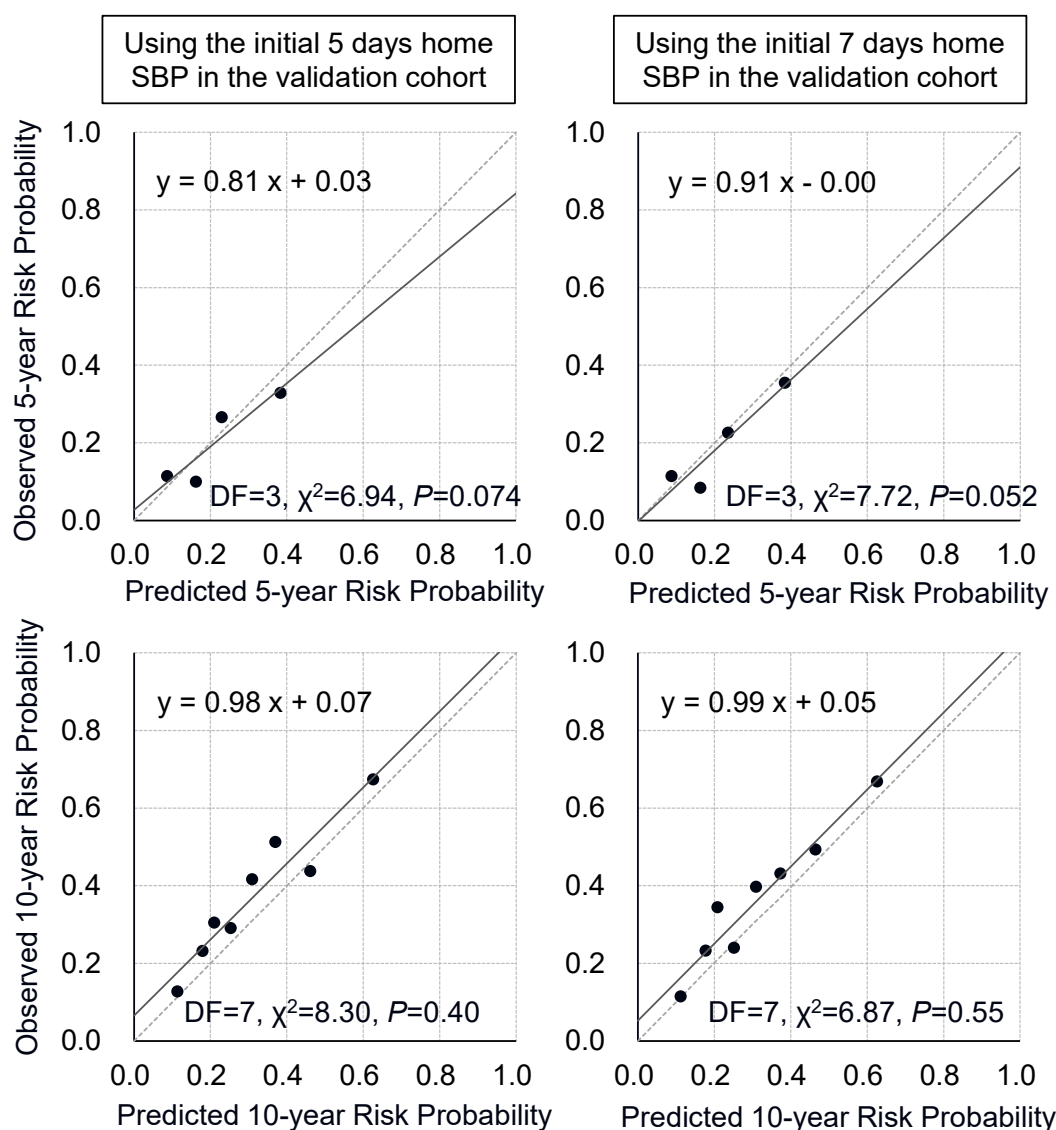

**Figure S3. The calibration plot using the initial 5- or 7-days home SBP values to estimate the predicted values**

Home SBP from the initial 5 days (left) or 7 days (right) measurements, instead of all home SBP measurements, were applied to the full model in the validation cohort. We then excluded 32 or 28 patients with home hypertension ( $\geq 135/85$  mmHg) based on the initial 5 days or 7 days home SBP values, respectively. In the regression equation, “y” means the observed risk probability and “x” means the predicted risk probability. SBP, systolic blood pressure; DF, degrees of freedom.

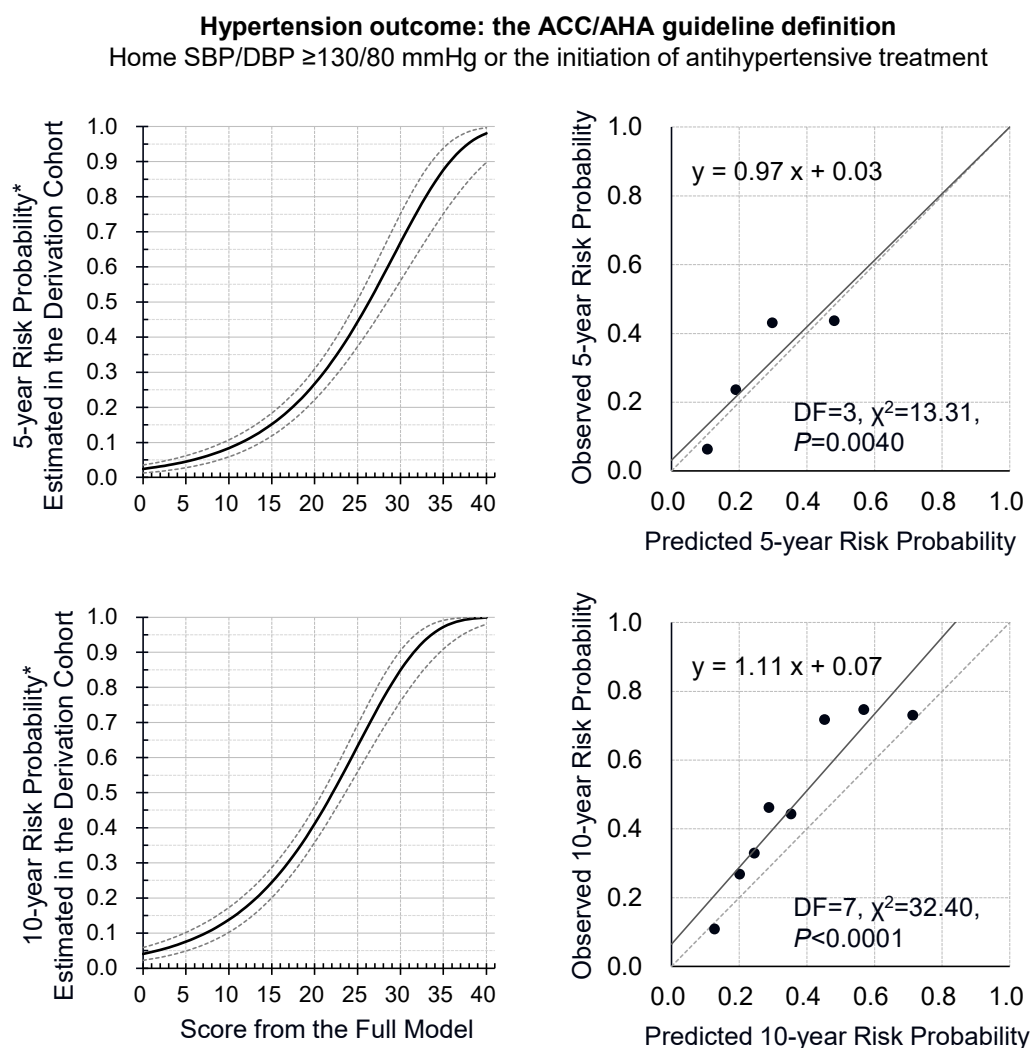

**Figure S4. The calibration plot based on the full model for the ACC/AHA hypertension outcome**

Calibration plot between the sixtilies/deciles of the predicted probabilities with the observed outcome rate in the validation cohort. The 1–3 sixties/deciles were merged into one group since the number of events was limited. Participants with home BP  $\geq$ 130/80 mmHg at baseline ( $n= 57$  in the derivation cohort and  $n= 68$  in the validation cohort) were additionally excluded from this analysis; in this analysis, 432 patients were included in the derivation cohort, while 421 patients were included in the validation cohort.

\* Estimated risk probabilities were recalculated due to the change in outcome.



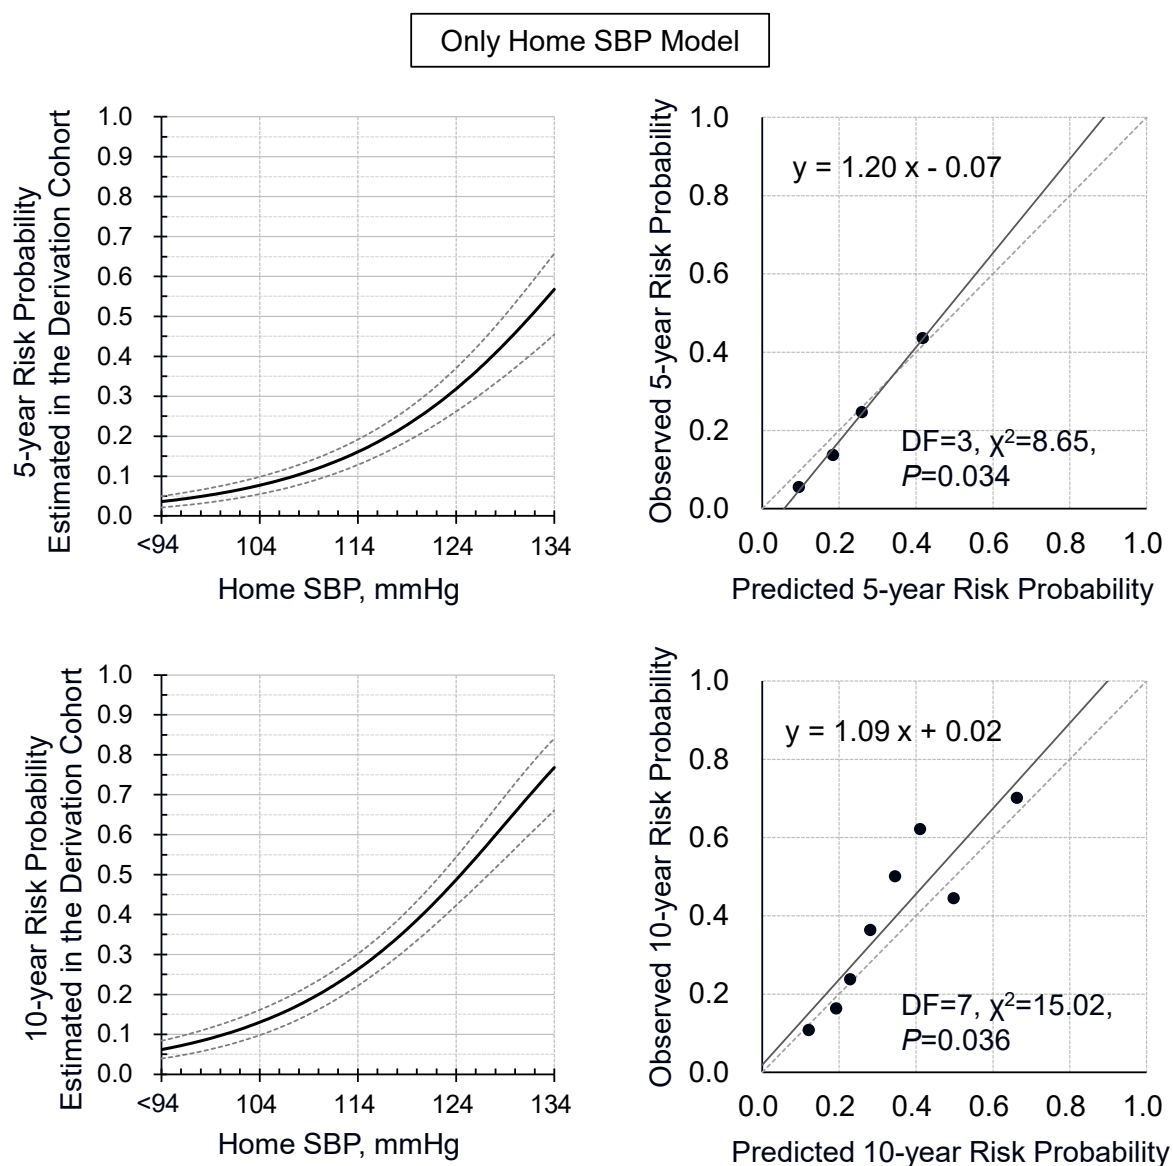

**Figure S5. The calibration plot based on the only home SBP model**

The predicted risk probability was calculated from the home SBP values (continuous variables) in the derivation cohort. In the regression equation, “y” means the observed risk probability and “x” means the predicted risk probability.

SBP, systolic blood pressure; DF, degree of freedom.

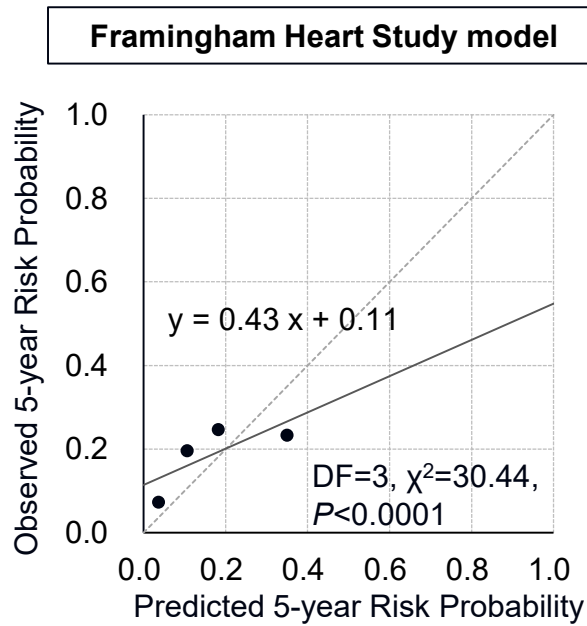

**Figure S6. The calibration plot based on Framingham Heart Study model**

The result was from the whole cohort (n=978) since the Framingham Heart study model was constructed in a different cohort. In the regression equation, “y” means the observed risk probability and “x” means the predicted risk probability.

SBP, systolic blood pressure; DF, degree of freedom.
